# Supplementary material for: Bortezomib-based immunosuppression after reduced-intensity conditioning hematopoietic stem cell transplantation: randomized phase II results
Source: PubMed Central journal article supplement — Haematologica. 2018 Jan 11;103(3):522–30. doi: 10.3324/haematol.2017.176859 (PMC5830392; doi:10.3324/haematol.2017.176859), 2018-03

## Bortezomib-based immunosuppression after reduced-intensity conditioning hematopoietic stem cell transplantation: randomized phase II results

John Koreth,<sup>1</sup> Haesook T. Kim,<sup>2</sup> Paulina B. Lange,<sup>1</sup> Samuel J. Poryanda,<sup>1</sup> Carol G. Reynolds,<sup>1</sup> Sharmila Chamling Rai,<sup>1</sup> Philippe Armand,<sup>1</sup> Corey S. Cutler,<sup>1</sup> Vincent T. Ho,<sup>1</sup> Brett Glotzbecker,<sup>1</sup> Rushdia Yusuf,<sup>1</sup> Sarah Nikiforow,<sup>1</sup> Yi-Bin Chen,<sup>3</sup> Bi-malangshu Dey,<sup>3</sup> Malgorzata McMasters,<sup>4</sup> Jerome Ritz,<sup>1</sup> Bruce R. Blazar,<sup>5</sup> Robert J. Soiffer,<sup>1</sup> Joseph H. Antin<sup>1</sup> and Edwin P. Alyea III<sup>1</sup>

<sup>1</sup>Division of Hematologic Malignancies, Dana-Farber Cancer Institute and Harvard Medical School, Boston, MA; <sup>2</sup>Department of Biostatistics and Computational Biology, Dana-Farber Cancer Institute and Harvard School of Public Health, Boston, MA; <sup>3</sup>Massachusetts General Hospital Cancer Center, Boston, MA; <sup>4</sup>Beth Israel Deaconess Hospital Cancer Center, Boston, MA and <sup>5</sup>University of Minnesota Masonic Cancer Center and Department of Pediatrics, Division of Blood and Marrow Transplantation, Minneapolis, MN, USA

©2018 Ferrata Storti Foundation. This is an open-access paper. doi:10.3324/haematol.2017.176859

Received: July 18, 2017.

Accepted: January 10, 2018.

Pre-published: January 11, 2018.

Correspondence: john\_koreth@dfci.harvard.edu

---

**Supplementary Table A:** Summary of aGVHD Outcome by HLA-match

Legend:

aGVHD: acute graft-versus-host disease

Cum. Incid.: cumulative incidence

CI: confidence interval

**Supplementary Figure 1:** Cumulative Incidence of Acute GVHD by Treatment Arm and HLA-match. (A): Grade II-IV acute GVHD for 8/8 match; (B) Severe Grade III-IV acute GVHD for 8/8 match; (C) Grade II-IV acute GVHD for 7/8 match; and (D) Severe Grade III-IV acute GVHD for 7/8 match. Acute GVHD events after relapse with IS taper were included

Black indicates arm A (tac/mtx); red indicates arm B (bort/tac/mtx); and blue indicates arm C (bort/sir/tac). Gray test was used for group comparison.

Legend:

Tac: tacrolimus

Mtx: methotrexate

Bort: bortezomib

Sir: sirolimus

Supplementary Table A. Summary of aGVHD outcome by HLA match.

(A) aGVHD after relapse with IS taper included

|                                     | Arm            |                     |                  | p-value |        |            |
|-------------------------------------|----------------|---------------------|------------------|---------|--------|------------|
|                                     | A<br>(Tac/MTX) | B<br>(Bort/Tac/MTX) | C (Bort/Sir/Tac) | A vs B  | A vs C | A vs (B&C) |
| D180 Cum. Inc. of grade II-IV aGVHD |                |                     |                  |         |        |            |
| 8/8 matched (95% CI)                | 33% (17, 49)   | 16% (6, 30)         | 19% (7, 34)      | 0.1     | 0.21   | 0.08       |
| 7/8 matched (95% CI)                | 33% (9, 60)    | 69% (34, 88)        | 27% (8, 51)      | 0.16    | 0.92   | 0.42       |
| D180 Cum Inc of grade III-IV aGVHD  |                |                     |                  |         |        |            |
| 8/8 matched (95% CI)                | 0% (-)         | 6% (1.1, 18)        | 9% (2.3, 23)     | 0.49    | 0.27   | 0.33       |
| 7/8 matched (95% CI)                | 8% (0.4, 32)   | 15% (2.2, 40)       | 27% (8, 51)      | 0.93    | 0.19   | 0.43       |

(B) aGVHD after relapse with IS taper excluded

|                                      |              |               |              |       |      |      |
|--------------------------------------|--------------|---------------|--------------|-------|------|------|
| D180 Cum. Inc. of grade II-IV aGVHD  |              |               |              |       |      |      |
| 8/8 matched (95% CI)                 | 33% (17, 49) | 13% (4, 27)   | 16% (6, 30)  | 0.046 | 0.13 | 0.03 |
| 7/8 matched (95% CI)                 | 33% (9, 60)  | 69% (34, 88)  | 13% (2, 36)  | 0.16  | 0.59 | 0.66 |
| D180 Cum. Inc. of grade III-IV aGVHD |              |               |              |       |      |      |
| 8/8 matched (95% CI)                 | 0% (-)       | 6% (1.1, 18)  | 9% (2.3, 23) | 0.49  | 0.27 | 0.33 |
| 7/8 matched (95% CI)                 | 8% (0.4, 32) | 15% (2.2, 40) | 13% (2, 36)  | 0.93  | 0.53 | 0.72 |

Gray test was used for group comparison

Figure S1. Cumulative Incidence of Acute GVHD by Treatment Arm and HLA match.

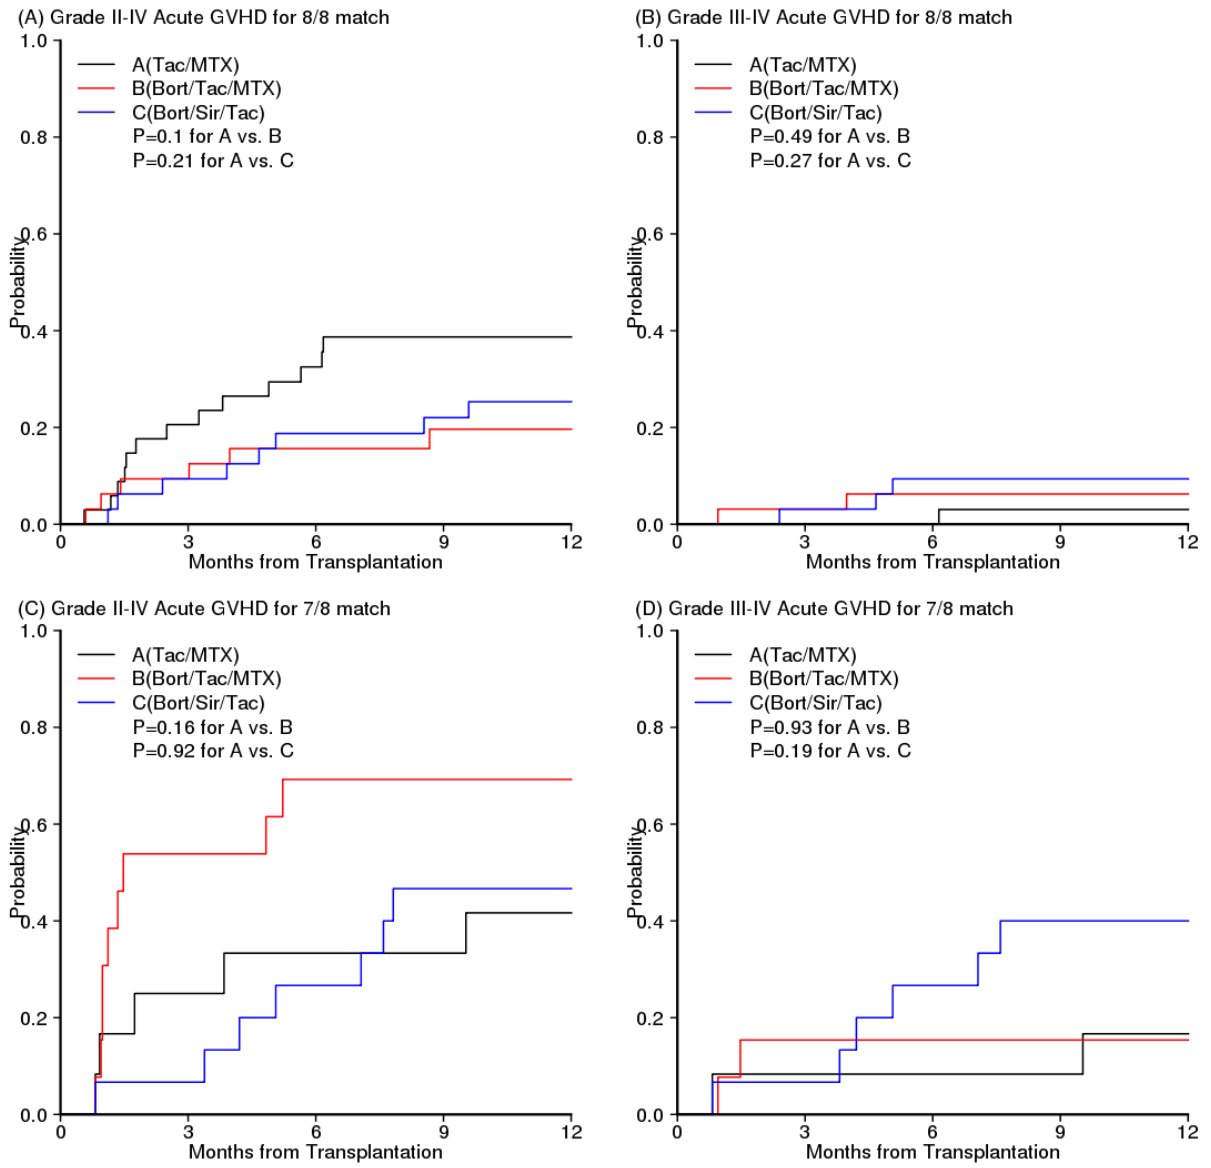

Supplement: 2017.176859.KORETH_SUPPL.pdf [file 2017.176859.KORETH_SUPPL.pdf]
